# Supplementary material for: Involvement of AGO1 and AGO2 in mammalian transcriptional silencing
Source: Springer Nature journal article supplement (doi:10.1038/nsmb1140), 2006-08-27
Supplement: 41594_2006_BFnsmb1140_MOESM1_ESM.pdf [file 41594_2006_BFnsmb1140_MOESM1_ESM.pdf]

# Supplementary Figure 1.

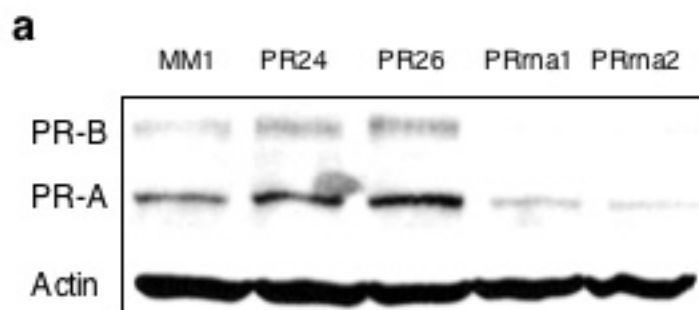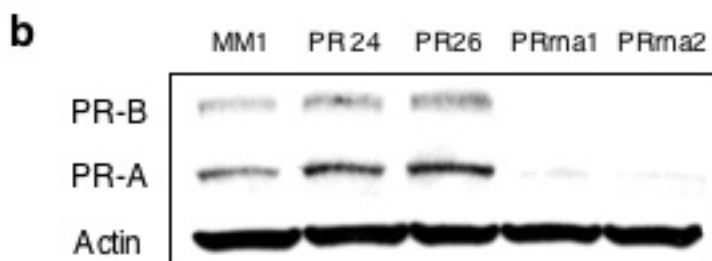

**Supplementary Figure 1.** Western analysis showing inhibition of PR in MCF-7 cells by mismatch containing RNA duplex MM1, agRNAs PR26 and PR24, and siRNAs PRma1 and PRma2. All RNAs were used at a concentration of **a**, 25 nM or **b**, 50 nM.
