# Supplementary material for: Involvement of AGO1 and AGO2 in mammalian transcriptional silencing
Source: Springer Nature journal article supplement (doi:10.1038/nsmb1140), 2006-08-27
Supplement: 41594_2006_BFnsmb1140_MOESM2_ESM.pdf [file 41594_2006_BFnsmb1140_MOESM2_ESM.pdf]

## Supplementary Figure 2.

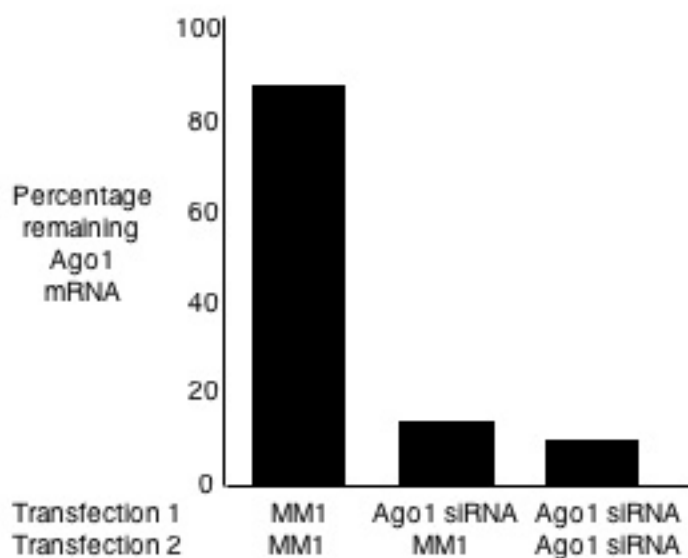

**Supplementary Figure 2.** Inhibition of Ago1 expression measured after a second transfection with an anti-Ago1 siRNA or a noncomplementary oligomer. All RNAs were used at a concentration of 25 nM. Results were normalized relative to levels of GAPDH RNA.
